# Supplementary material for: Combining Battery‐Type and Pseudocapacitive Charge Storage in Ag/Ti3C2T x MXene Electrode for Capturing Chloride Ions with High Capacitance and Fast Ion Transport
Source: PubMed Central journal article supplement (PMC7509648; doi:10.1002/advs.202000621), 2020-08-27
Supplement: ADVS-7-2000621-s001.pdf [file ADVS-7-2000621-s001.pdf]

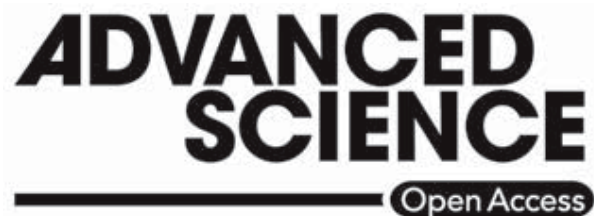

## Supporting Information

for *Adv. Sci.*, DOI: 10.1002/adv.202000621

Combining Battery-Type and Pseudocapacitive Charge Storage in Ag/Ti<sub>3</sub>C<sub>2</sub>T<sub>x</sub> MXene Electrode for Capturing Chloride Ions with High Capacitance and Fast Ion Transport

*Mingxing Liang, Lei Wang, Volker Presser,\* Xiaohu Dai, Fei Yu,\* and Jie Ma\**

## Supporting Information

# Combining Battery-type and Pseudocapacitive Charge Storage in Ag/Ti<sub>3</sub>C<sub>2</sub>T<sub>x</sub> MXene Electrode for Capturing Chloride Ions with High Capacitance and Fast Ion Transport

Mingxing Liang<sup>1, 4§</sup>, Lei Wang<sup>1, 4, 6§</sup>, Volker Presser<sup>5, 6\*</sup>, Xiaohu Dai<sup>1, 4</sup>, Fei Yu<sup>2\*</sup>, Jie Ma<sup>1, 3, 4\*</sup>

<sup>1</sup> State Key Laboratory of Pollution Control and Resource Reuse, College of Environmental Science and Engineering, Tongji University, Shanghai, 200092, P. R. China

<sup>2</sup> College of Marine Ecology and Environment, Shanghai Ocean University, Shanghai 201306, P.R. China

<sup>3</sup> Research Center for Environmental Functional Materials, College of Environmental Science and Engineering, Tongji University, 1239 Siping Road, Shanghai 200092, P.R. China

<sup>4</sup> Shanghai Institute of Pollution Control and Ecological Security, Shanghai, 200092, P.R. China

<sup>5</sup> INM – Leibniz Institute for New Materials, Campus D2 2, 66123 Saarbrücken, Germany

<sup>6</sup> Department of Materials Science and Engineering, Saarland University, Campus D2 2, 66123 Saarbrücken, Germany

---

<sup>§</sup> These authors contributed equally to this work.

\* Corresponding author

Jie Ma, E-mail: jma@tongji.edu.cn

Fei Yu, E-mail: f-yu@shou.edu.cn

Volker Presser, E-mail: volker.presser@leibniz-inm.de

### Calculation method and equations

The Cl<sup>-</sup>-removal capacity (Cl<sup>-</sup>-RC), Cl<sup>-</sup>-removal rate (Cl<sup>-</sup>-RR) and energy consumption (EC) are calculated using following equations, respectively.

$$\text{Cl}^{-}\text{-RC (mg-Cl}^{-}\text{/g-electrode)} = \frac{(C_0 - C_e) \times V \times 35.5 \times 1000}{m} \quad (1)$$

$$\text{Cl}^{-}\text{-RR (mg-Cl}^{-}\text{/g-electrode/min)} = \frac{\text{Cl}^{-}\text{-RC}}{t} \times 60 \quad (2)$$

$$\text{EC (kWh/kg-Cl}^{-}\text{)} = \frac{i \times \int v dt}{3600 \times (C_0 - C_e) \times V \times 35.5} \quad (3)$$

Where the  $C_0$  means the initial concentration of NaCl, mol/L;  $C_e$  represents the concentration of NaCl after charging, mol/L;  $V$  shows the volume of NaCl, L;  $m$  denotes the mass of Cl<sup>-</sup> storage electrode, g;  $t$  signifies the desalination time, s;  $i$  and  $v$  expresses the current (A) and potential (V) during desalination process, respectively.

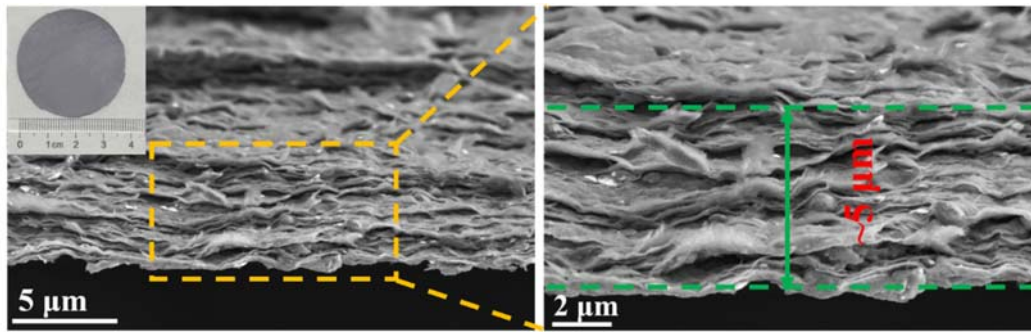

**Figure S1.** SEM images of Ti<sub>3</sub>C<sub>2</sub>T<sub>x</sub>/Ag-3 hybrid (The inset: Digital photograph).

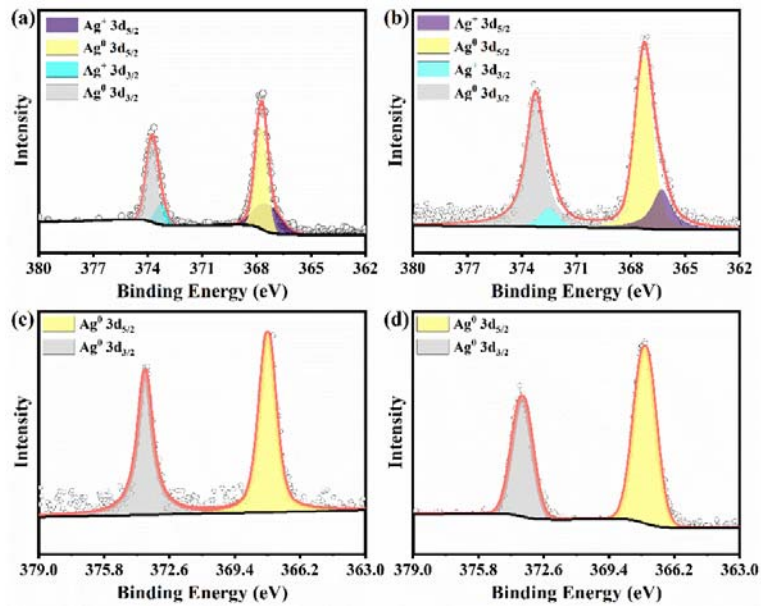

**Figure S2.** High-resolution Ag 3d XPS spectra of  $\text{Ti}_3\text{C}_2\text{T}_x/\text{Ag}$  hybrid: a)  $\text{Ti}_3\text{C}_2\text{T}_x/\text{Ag}$ -3, b)  $\text{Ti}_3\text{C}_2\text{T}_x/\text{Ag}$ -6, c)  $\text{Ti}_3\text{C}_2\text{T}_x/\text{Ag}$ -9 and d)  $\text{Ti}_3\text{C}_2\text{T}_x/\text{Ag}$ -12.

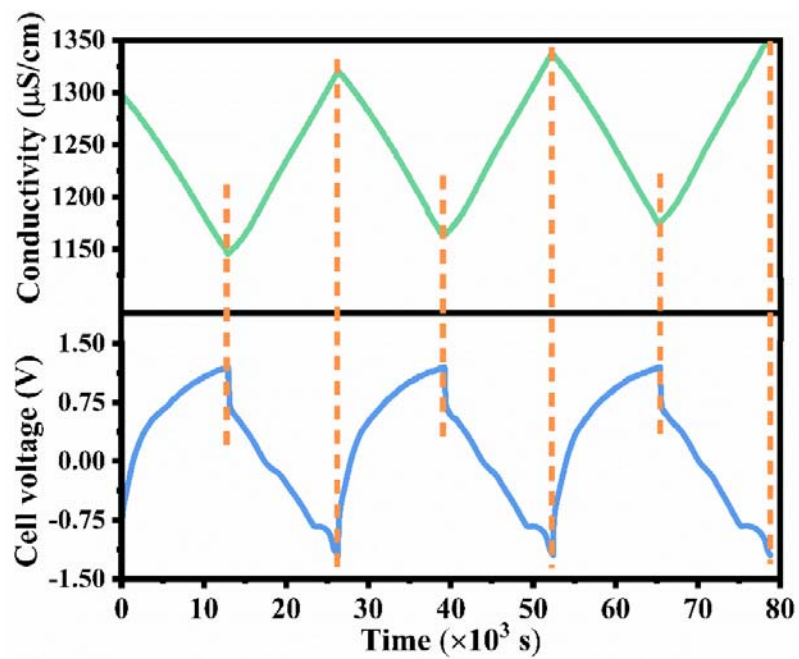

**Figure S3.** The conductivity (upper) and cell voltage change (lower) during the desalination process of  $\text{Ti}_3\text{C}_2\text{T}_x/\text{Ag}$ -3 at 20 mA/g.

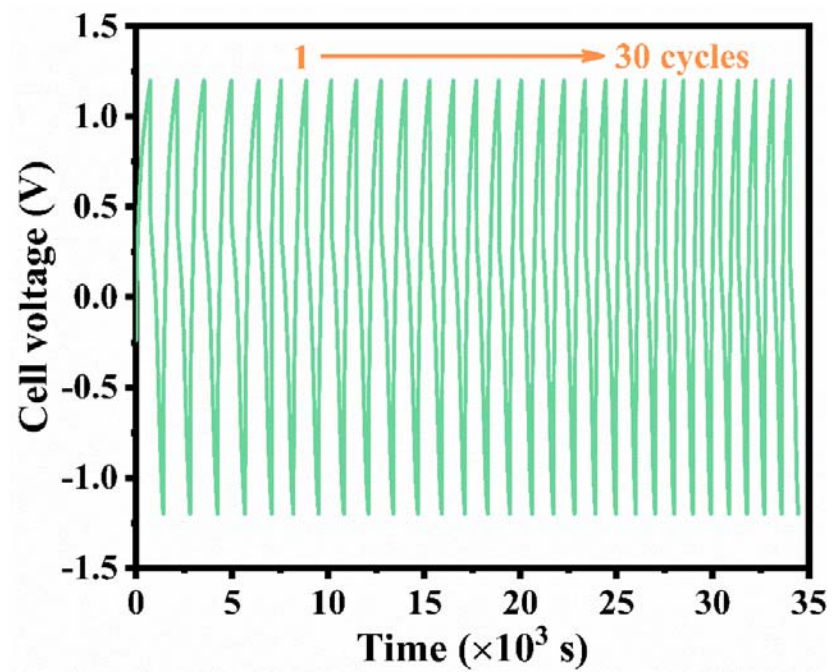

**Figure S4.** Potential curves of  $\text{Ti}_3\text{C}_2\text{T}_x/\text{Ag}$ -3 electrode at 100 mA/g during 30 desalination cycles.

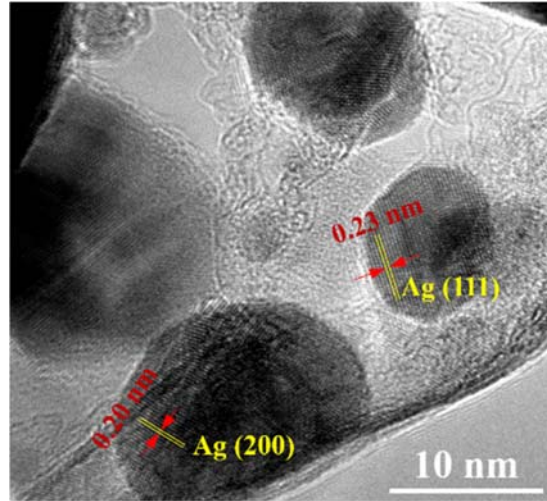

**Figure S5.** High-resolution TEM image of Ti<sub>3</sub>C<sub>2</sub>T<sub>x</sub>/Ag-3 electrode after a long-term cycling.



**Table S1. The content of Ag and AgCl species in Ti<sub>3</sub>C<sub>2</sub>T<sub>x</sub>/Ag hybrid (EDX measurement).**

| <b>Electrode materials</b>                            | <b>Weight percent of Ag<sup>0</sup> (wt%)</b> | <b>Weight percent of AgCl (wt%)</b> | <b>Weight percent of total Ag (wt%)</b> |
|-------------------------------------------------------|-----------------------------------------------|-------------------------------------|-----------------------------------------|
| <b>Ti<sub>3</sub>C<sub>2</sub>T<sub>x</sub>/Ag-3</b>  | 7.90                                          | 17.68                               | 21.22                                   |
| <b>Ti<sub>3</sub>C<sub>2</sub>T<sub>x</sub>/Ag-6</b>  | 12.52                                         | 8.64                                | 19.03                                   |
| <b>Ti<sub>3</sub>C<sub>2</sub>T<sub>x</sub>/Ag-9</b>  | 19.79                                         | -                                   | 19.79                                   |
| <b>Ti<sub>3</sub>C<sub>2</sub>T<sub>x</sub>/Ag-12</b> | 21.01                                         | -                                   | 21.01                                   |

**Table S2.** The content of Ag and AgCl species in Ti<sub>3</sub>C<sub>2</sub>T<sub>x</sub>/Ag-3 hybrid after different operation (EDX measurement).

| <b>Operation</b>                      | <b>Weight percent of Ag<sup>0</sup> (wt%)</b> | <b>Weight percent of AgCl (wt%)</b> | <b>Weight percent of total Ag (wt%)</b> |
|---------------------------------------|-----------------------------------------------|-------------------------------------|-----------------------------------------|
| <b>Before inverse-voltage washing</b> | 7.90                                          | 17.68                               | 21.22                                   |
| <b>After inverse-voltage washing</b>  | 17.21                                         | 6.18                                | 21.86                                   |
| <b>After long-term cycling</b>        | 19.63                                         | 1.90                                | 21.06                                   |
